# Supplementary material for: Trehalose-6-Phosphate Synthase Contributes to Rapid Cold Hardening in the Invasive Insect Lissorhoptrus oryzophilus (Coleoptera: Curculionidae) by Regulating Trehalose Metabolism
Source: MDPI journal article supplement (doi:10.3390/insects14120903), 2023-11-23
Supplement: s1 [file s1]

**Table S1.** GeneBank accession number of species and gene sequences to construct *LoTPS* phylogenetic tree.

| Species                               | GeneBank Accession Number |
|---------------------------------------|---------------------------|
| <i>Sitophilus oryzae</i>              | XP_030760030              |
| <i>Dendroctonus ponderosae</i>        | XP_019761749.1            |
| <i>Rhynchophorus ferrugineus</i>      | KAF7280304.1              |
| <i>Tenebrio molitor</i>               | KAH0815604.1              |
| <i>Tribolium castaneum</i>            | XP_975776.2               |
| <i>Leptinotarsa decemlineata</i>      | XP_023020816.1            |
| <i>Anoplophora glabripennis</i>       | XP_023311886.1            |
| <i>Tribolium madens</i>               | XP_044255908.1            |
| <i>Diabrotica virgifera virgifera</i> | XP_028127759.1            |
| <i>Nicrophorus vespilloides</i>       | XP_017769007.1            |
| <i>Agrilus planipennis</i>            | XP_025832646.1            |
| <i>Aethina tumida</i>                 | XP_019865342.1            |
| <i>Harmonia axyridis</i>              | XP_045480405.1            |
| <i>Frankliniella occidentalis</i>     | XP_026272691.1            |
| <i>Cotesia glomerata</i>              | XP_044576379.1            |
| <i>Apis mellifera</i>                 | XP_026297280.1            |
| <i>Gampsocleis gratiosa</i>           | APZ77037.1                |
| <i>Polistes dominula</i>              | XP_015172546.1            |
| <i>Harpegnathos saltator</i>          | XP_011139179.1            |
| <i>Apis laboriosa</i>                 | XP_043793631.1            |
| <i>Bombus terrestris</i>              | XP_020719094.1            |
| <i>Athalia rosae</i>                  | XP_012252443.1            |
| <i>Polistes fuscatus</i>              | XP_043494062.1            |
| <i>Apis florea</i>                    | XP_031771052.1            |
| <i>Neodiprion lecontei</i>            | XP_015522281.2            |
| <i>Neodiprion pinetum</i>             | XP_046474850.1            |
